# Supplementary material for: EUV photofragmentation study of hybrid nonchemically amplified resists containing antimony as an absorption enhancer
Source: Royal Society of Chemistry journal article supplement (doi:10.1039/c7ra12934c), 2018-01-01
Supplement: c7ra12934c1.pdf [file c7ra12934c1.pdf]

## Supporting Information

### EUV Photofragmentation Study of Hybrid Nonchemically Amplified Resists Containing Antimony as Absorption Enhancer

*C. A. S. Moura<sup>a†</sup>, G. K. Belmonte<sup>a†</sup>, P. G. Reddy<sup>b</sup>, K. E. Gonsalves<sup>b</sup> and D. E. Weibel<sup>a\*</sup>*

<sup>a</sup>Department of Chemical Physics, Chemical Institute, UFRGS, Porto Alegre, Postal Code: 91501-970, RS, Brazil.

<sup>b</sup>School of Basic Sciences, Indian Institute of Technology Mandi, Mandi – 175001, Himachal Pradesh, India.

\*Corresponding author: Tel: +55-5133086204. Fax: +55-5133087304.

E-mail: danielw@iq.ufrgs.br

<sup>†</sup>These authors contributed equally to this work

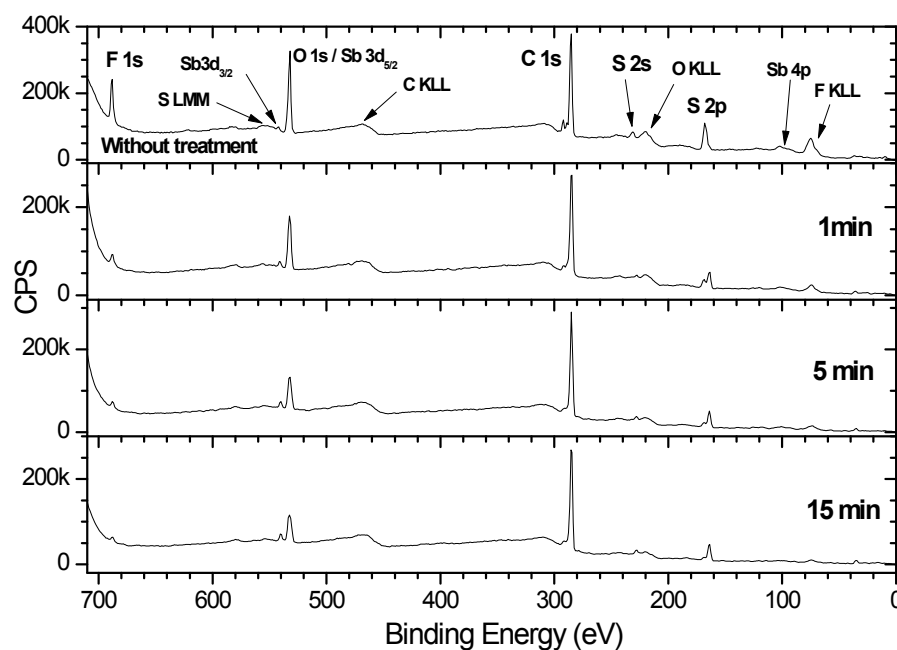

**Figure S1.** XPS wide scan spectra of pristine hybrid non-CAR resist 2.15%-MAPDSA-MAPDST thin film and irradiated at 103.5 eV for 1, 5 and 15 min.

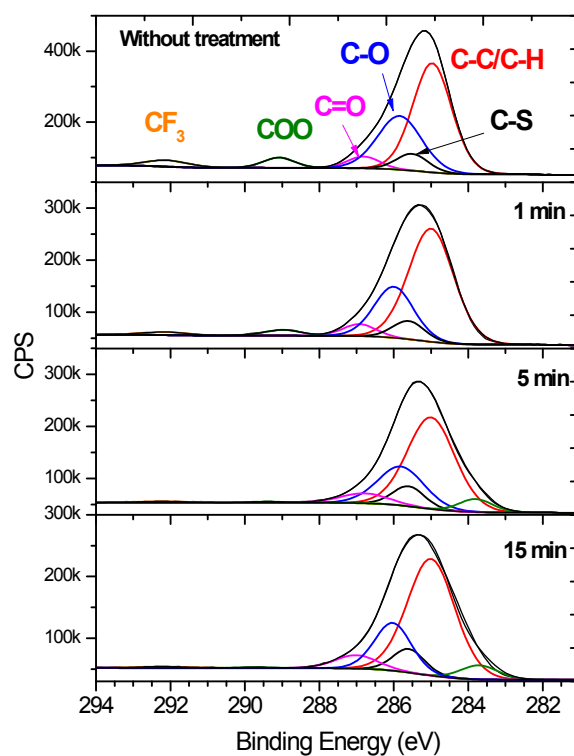

**Figure S2.** High-resolution XPS spectra of the C 1s envelope of pristine hybrid non-CAR resist 2.15%-MAPDSA-MAPDST thin film and irradiated at 103.5 eV for 1, 5 and 15 min.

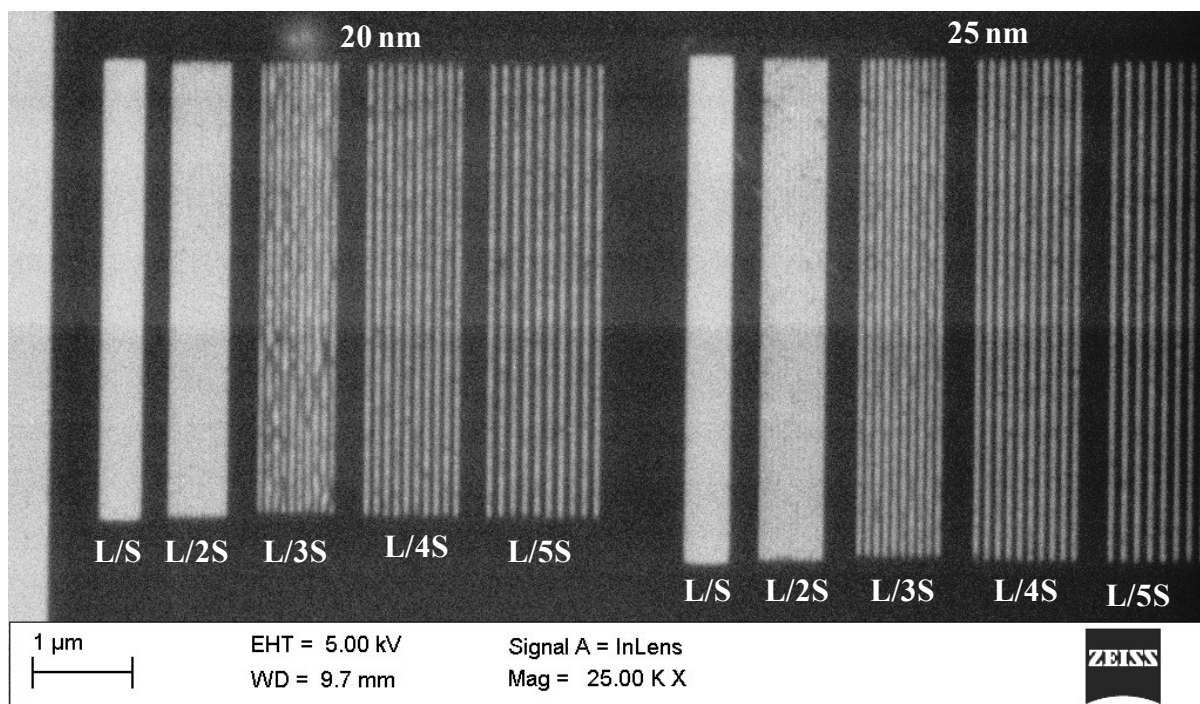

**Figure S3.** SEM image of EUVL patterned 20 and 25 nm (L/S to L/5S) line patterns of 2.15%-MAPDSA-MAPDST resist at the dose  $\sim 22 \text{ mJ/cm}^2$ .
